# Supplementary material for: Research priorities in children and adults with congenital heart disease: a James Lind Alliance Priority Setting Partnership
Source: PubMed Central journal article supplement (PMC9843188; doi:10.1136/openhrt-2022-002147), 2022-11-22
Supplement: openhrt-2022-002147supp002.pdf [file openhrt-2022-002147supp002.pdf]

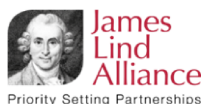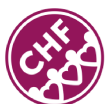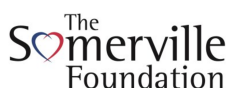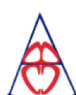

British Congenital  
Cardiac Association

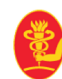

SCTS  
Society for Cardiothoracic Surgery  
in Great Britain and Ireland

## Have YOUR say on the future of Congenital Heart Disease research!

We are conducting a national study to identify and prioritise areas of future research in congenital heart disease that are most important to patients, their families, and healthcare professionals. With your help, the findings will have a major impact on the direction of congenital heart disease research in the UK— **so we want to hear from you!**

This project is focused on the how we treat and look after those with congenital heart disease throughout life, including prior to birth. We are specifically interested in your questions relating to:

- **Diagnosis**, during pregnancy or after birth
- **Treatment**, such as medical therapy (eg. drugs), catheter procedures, surgery, transplant, lifestyle and psychological or social help
- **Outcomes** of the conditions and/or treatments, and the impact on patients and their families, including the physical, psychological and social effects of living with congenital heart disease

We are not looking at areas such as causes of congenital heart defects, acquired heart disease in those without a congenital heart defect, or aspects of congenital disorders that do not affect the heart, which are outside of those above.

**What questions would you like to see answered by future research, relating to the diagnosis, treatment, or outcomes of congenital heart disease?** *Please enter up to three questions, one in each of the boxes below.*

**Question 1:**

**Question 2:**

**Question 3:**

Now we would like to know a bit about who you are and your interest in congenital heart disease, or the person on whose behalf you are completing this survey. *Please tick one box for each question below.*

**What is your age (years)?**  0-10  11-15  16-20  21-35  36-50  51-65  65+  Prefer not to say

**What is your gender?**  Male  Female  Other  Prefer not to say

**What is your ethnicity?**  Arab  Asian - Bangladeshi  Asian - Indian  Asian - Pakistani  Chinese  
 Any other Asian background  Black - Caribbean  Black - African  Any other Black background  
 White British  White Irish  Any other White background  Mixed - White/Asian  Mixed - White/Black  
 Any other Mixed background  Any other ethnic group  Prefer not to say

**Which of these best describes you?**  I was born with a congenital heart defect  Parent  Other relative  
 Healthcare professional  Charity  Other - please specify:

**Thank you for completing this initial survey.** If given to you in clinic, please hand it in, or scan/photo and email to: [congenitalPSP@contacts.bham.ac.uk](mailto:congenitalPSP@contacts.bham.ac.uk), or post in an envelope to: **Freepost CONGENITAL PSP** (no stamp required). For more information, including on how we handle your personal data, please visit: [www.birmingham.ac.uk/congenital-psp](http://www.birmingham.ac.uk/congenital-psp)
