# Supplementary material for: Research priorities in children and adults with congenital heart disease: a James Lind Alliance Priority Setting Partnership
Source: PubMed Central journal article supplement (PMC9843188; doi:10.1136/openhrt-2022-002147), 2022-11-22
Supplement: openhrt-2022-002147supp003.pdf [file openhrt-2022-002147supp003.pdf]

## Priorities for Congenital Heart Disease Research

### Child/antenatal

Pre- and post-natal screening strategies

Minimise organ damage during surgery

Effects on brain development and behaviour

Long-term outcomes and life expectancy

### Child/antenatal and Adult

Less invasive interventions

Longevity of the Fontan circulation

Impact on mental health

Technology to deliver personalised care

Need for repeated operations and interventions

Impact on quality of life

### Adult

Pregnancy, childbirth and motherhood

Heart failure treatment

Management of arrhythmias including sudden death

Transplantation and long-term mechanical support

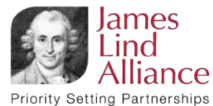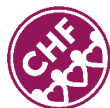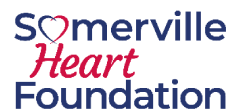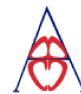

British Congenital Cardiac Association

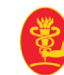

SCTS  
Society for Cardiothoracic Surgery  
in Great Britain and Ireland
